# Supplementary material
Source: PubMed Central journal article supplement (PMC3884591)
Supplement: NIHMS528678-supplement-supporting_information.pdf [file NIHMS528678-supplement-supporting_information.pdf]

Supporting Information for

## Understanding the Dark and Light-enhanced Bactericidal Action of Cationic Conjugated Polyelectrolytes and Oligomers

Ying Wang,<sup>1,2</sup> Stephen D. Jett,<sup>3</sup> John Crum,<sup>4</sup> Kirk S. Schanze,<sup>5</sup> Eva Y. Chi,<sup>1\*</sup>  
and David G. Whitten<sup>1\*</sup>

<sup>1</sup> Department of Chemical and Nuclear Engineering, Center for Biomedical Engineering, <sup>2</sup> Department of Chemistry and Chemical Biology, <sup>3</sup> Department of Cell Biology and Physiology, University of New Mexico, Albuquerque, NM 87131-1341, USA, <sup>4</sup> The Scripps Research Institute, La Jolla, CA 92037, USA and <sup>5</sup> Department of Chemistry, University of Florida, Gainesville, FL 32611-7200 USA

\* To whom correspondence should be addressed. E. Y. C., E-mail: evachi@unm.edu; D. G. W., E-mail: whitten@unm.edu.

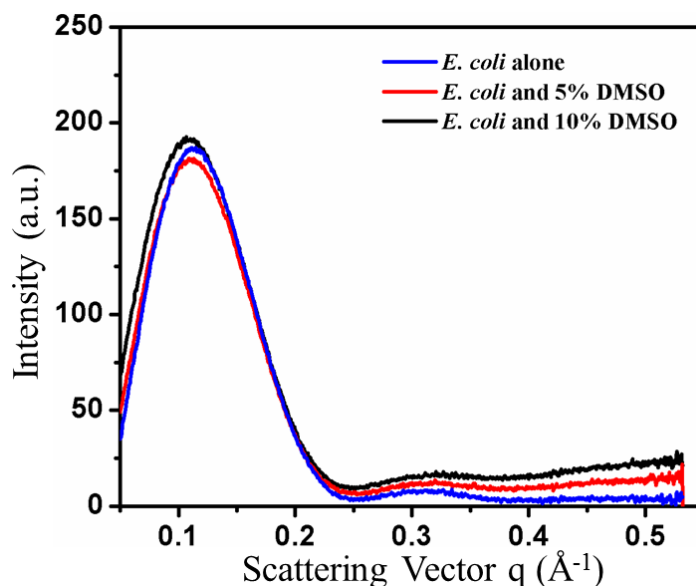

Figure S1. SAXS data for *E. coli* total lipid (12.5 mg/ml) model membranes alone and incubated with DMSO.

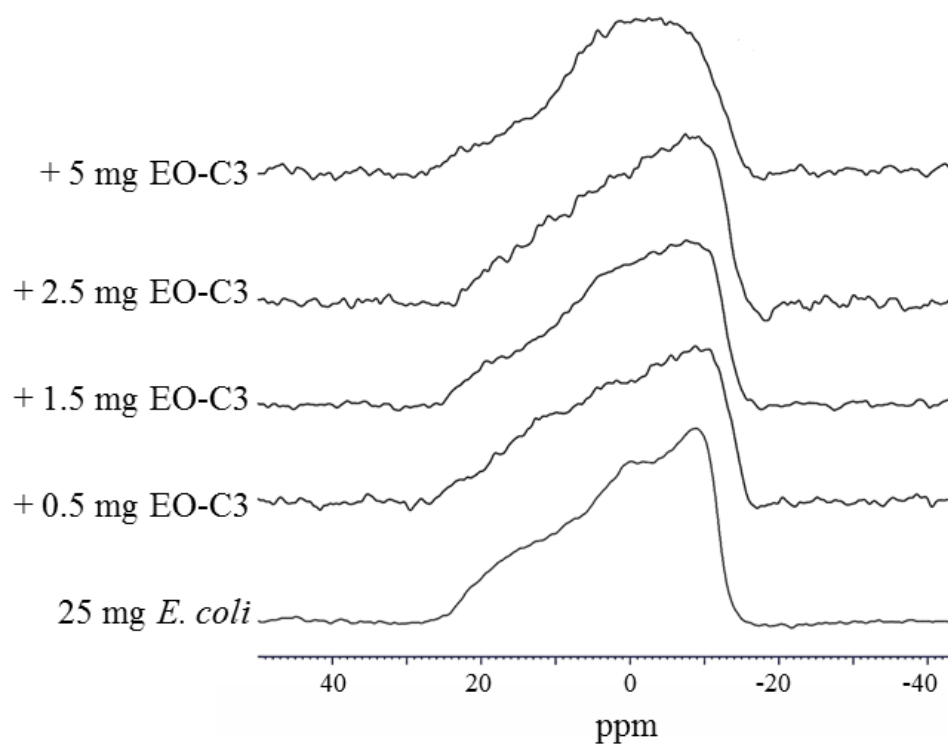

Figure S2.  $^{31}\text{P}$  SS-NMR spectra of 25 mg model membranes made by *E. coli* lipid extracts mixed with various amounts of EO-OPE-1(C3).

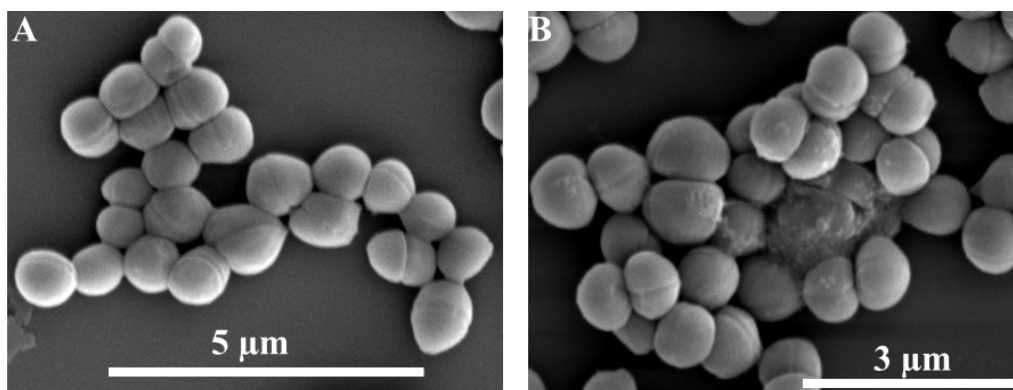

Figure S3. SEM micrographs of *S.epi* (ATCC 14990) cells ( $10^8$  CFU/ml) alone (A), incubated with  $10\ \mu\text{g/ml}$  PPE-DABCO (B) under UV-420 irradiation for 60 min.
